# Supplementary material for: BioRT-Flux-PIHM v1.0: a watershed biogeochemical reactive transport model
Source: Copernicus journal article supplement (doi:10.5194/gmd-2020-157), 2020-07-13
Supplement: Supplementary file 1 [file gmd-2020-157-supplement.pdf]

# Supporting information

## S1. Model verification

The BioRT-Flux-PIHM 1.0 was verified against the benchmark CrunchTope, which is a widely used subsurface reactive transport model (Steeffel and Lasaga, 1994; Steeffel et al., 2015). Due to the limitation of CrunchTope in representing complex terrain and land-surface process, verification is performed under simplified hydrological conditions with 1-D column and constant flow rates such that it focuses on biogeochemical reactive transport processes such as advection, diffusion, dispersion, and biogeochemical reactions. Specifically, three cases of soil phosphorus, carbon, and nitrogen were verified for temporal evolution and spatial pattern of relevant solute concentrations (Figure S1 – S7). The soil phosphorus case, which involves geochemically kinetic and thermodynamic processes (i.e., apatite dissolution and phosphorous speciation), was first tested for the solution accuracy of the bulk code that was inherited from the original RT-Flux-PIHM. Soil carbon and nitrogen cases that involve microbially driven processes, such as soil carbon decomposition and mineralization, nitrification and denitrification, were further verified for the solution accuracy of the augmented BioRT module.

For the physical context, two transport scenarios were set up in the 1D column (i.e., 100 grids  $\times$  0.1 m) with a constant flow rate of 2 m/d, i.e., advection-only case and advection + diffusion + dispersion case (Table S1).

**Table S1.** Flow and transport setup in the verification

| # of grid | Grid size (m) | Flow rate (m/d) | Advection-only case                        |                       | Advection + diffusion + dispersion         |                  |
|-----------|---------------|-----------------|--------------------------------------------|-----------------------|--------------------------------------------|------------------|
|           |               |                 | Diffusion coefficient (cm <sup>2</sup> /s) | Dispersivity (m)      | Diffusion coefficient (cm <sup>2</sup> /s) | Dispersivity (m) |
| 100       | 0.1           | 2               | $1.0 \times 10^{-20}$                      | $1.0 \times 10^{-20}$ | $1.0 \times 10^{-5}$                       | 0.1              |

24 **S1.1. Soil phosphorus processes**

25 Reaction network includes one kinetically controlled P-containing mineral  
 26 dissolution (i.e., apatite) and three thermodynamically controlled phosphorus speciation  
 27 reactions (Figure S1). The conservative tracer Cl is additionally included in the simulation  
 28 for testing non-reactive transport processes.

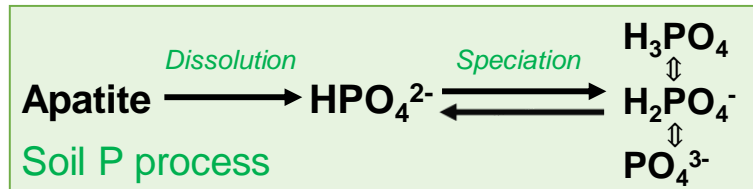

29  
 30 **Figure S1.** Soil phosphorus processes in the CrunchTope verification.

31  
 32 In the advection-only case where diffusion coefficient ( $1.0 \times 10^{-20}$  cm<sup>2</sup>/s) and  
 33 dispersivity ( $1.0 \times 10^{-20}$  m) are set to be negligible, we test the code's ability to capture  
 34 the sharp concentration front of phosphorus species. In the other case, diffusion and  
 35 dispersion processes are included with diffusion coefficient ( $1.0 \times 10^{-5}$  cm<sup>2</sup>/s) and  
 36 dispersivity (0.1 m) while maintaining all other flow and geochemical conditions the same  
 37 as the advection-only case (Table S1). That is, in both cases, the columns are initially set  
 38 up at conditions of pH = 6.0, Cl<sup>-</sup> =  $1.0 \times 10^{-4}$  (mol/L),  $HPO_4^{2-}$  =  $1.0 \times 10^{-7}$  (mol/L), Ca<sup>2+</sup> =  
 39  $1.0 \times 10^{-7}$  (mol/L), apatite = 1% (volume fraction), porosity = 0.4. The injection condition  
 40 is set up as pH = 4.0, Cl =  $1.0 \times 10^{-3}$  (mol/L),  $HPO_4^{2-}$  =  $1.0 \times 10^{-5}$  (mol/L), Ca<sup>2+</sup> =  $1.0 \times 10^{-$   
 41 <sup>5</sup> (mol/L). The phosphorous reaction network with kinetic and thermodynamic parameters  
 42 are summarized in Table S2.

43 **Table S2.** Soil phosphorous reaction in the CrunchTope verification

| Phosphorous reaction   | Equation                                                                   | Log <sub>10</sub> k (mol/m <sup>2</sup> /s) | Log <sub>10</sub> K <sub>eq</sub> |
|------------------------|----------------------------------------------------------------------------|---------------------------------------------|-----------------------------------|
| Apatite dissolution    | $Ca_5(PO_4)_3(OH) + 4H^+ \rightleftharpoons 5Ca^{2+} + 3HPO_4^{2-} + H_2O$ | -11.0                                       | -3.07                             |
| Phosphorous speciation | $H_3PO_4 \rightleftharpoons H^+ + H_2PO_4^-$                               |                                             | -2.17                             |
|                        | $H_2PO_4^- \rightleftharpoons H^+ + HPO_4^{2-}$                            |                                             | -7.21                             |
|                        | $HPO_4^{2-} \rightleftharpoons H^+ + PO_4^{3-}$                            |                                             | -12.1                             |

44 Modeling results show that the code BioRT-Flux-PIHM was able to reproduce  
 45 CrunchTope results under different flow conditions (Figure S2). That is, BioRT-Flux-PIHM  
 46 captured both the sharp concentration front in the advection-only case (Figure S2a, c)  
 47 and the smooth concentration front in the advection + diffusion + dispersion case (Figure  
 48 S2b, d). The close match of non-reactive  $\text{Cl}^-$  in the temporal and spatial trend indicates a  
 49 robust accuracy of transport code under varying flow conditions. Result consistencies in  
 50 the temporal evolution and spatial pattern of  $\text{H}^+$  and total dissolved phosphorus (TP)  
 51 concentration suggest a valid implementation of kinetic reaction (i.e., apatite dissolution)  
 52 in the reaction code.

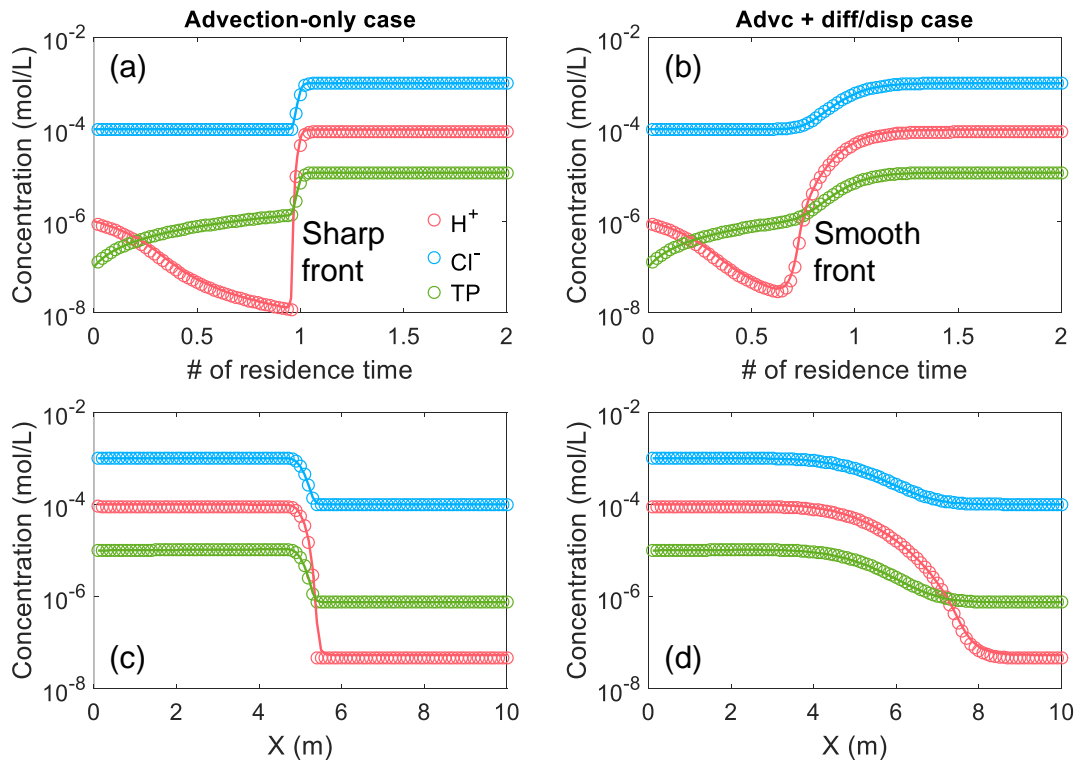

53  
 54 **Figure S2.** Soil phosphorus verification under advection case (left column) and advection +  
 55 diffusion + dispersion case (right column). Temporal evolution of solutes plotted at the column  
 56 outlet (a, b) and spatial pattern plotted at one residence time (c, d). Circle markers are BioRT-  
 57 Flux-PIHM results, while solid lines are CrunchTope results. The close match of BioRT-Flux-PIHM  
 58 and CrunchTope results indicates a robust accuracy.

59  
 60 Phosphate reaction was also validated against CrunchTope under two transport  
 61 cases (Figure S3). Phosphate speciation (i.e., fractions of  $\text{H}_3\text{PO}_4$ ,  $\text{H}_2\text{PO}_4^-$ ,  $\text{HPO}_4^{2-}$ ,  $\text{PO}_4^{3-}$ )

62 to TP) is a function of solution pH. The consistency of phosphate partitioning results  
 63 suggests that the implementation of aqueous speciation code in the reaction module is  
 64 robust under different pH conditions. In summary, the soil phosphorus case demonstrates  
 65 that the BioRT-Flux-PIHM maintains a robust accuracy in simulating both geochemical  
 66 kinetic and thermodynamic reactions under varying transport conditions.

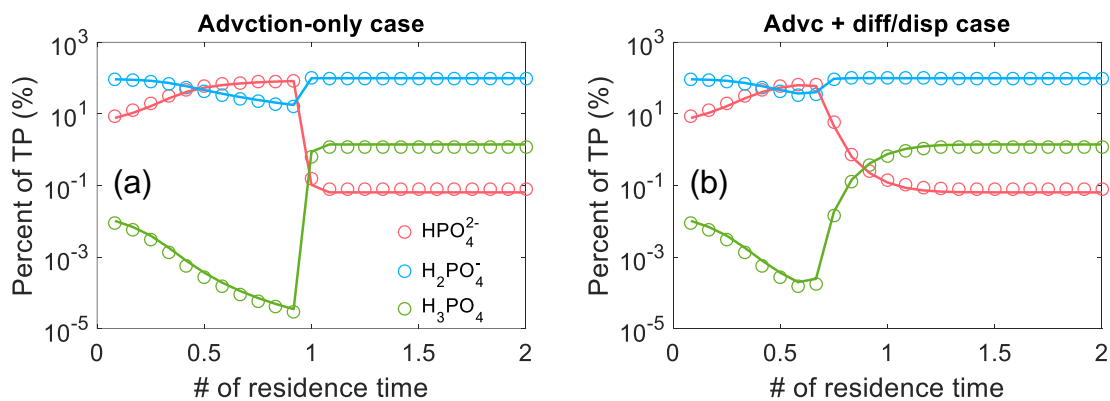

67  
 68 **Figure S3.** Phosphate chemistry verification under advection case (a) and advection + diffusion  
 69 + dispersion case (b). Orthophosphate (i.e., PO<sub>4</sub><sup>3-</sup>) is ignored in the plot due to its extreme low  
 70 concentration. Circles are BioRT-Flux-PIHM results, while solid lines are CrunchTope results. The  
 71 close match of BioRT-Flux-PIHM and CrunchTope results indicates a robust accuracy.

72

### 73 S1.2. Soil carbon processes

74 Simulated carbon processes include soil organic carbon (SOC) decomposition and  
 75 dissolved organic carbon (DOC) mineralization (Figure S4). Both these soil carbon  
 76 processes are microbially-mediated reactions following the Monod rate law (Eq. (15)).  
 77 Soil temperature is set at 20 °C. A variety of different electron acceptors (i.e., O<sub>2</sub>, NO<sub>3</sub><sup>-</sup>,  
 78 SO<sub>4</sub><sup>2-</sup>) are tested in the mineralization process to verify the code's implementation of  
 79 parallel reaction pathways. BioRT-Flux-PIHM is designed to model multiple microbially-  
 80 mediated reactions and their interactions under dynamic redox conditions; thus, it is  
 81 critical to reproducing redox ladder geochemistry (Figure S5a).

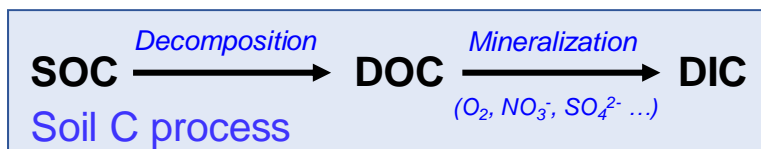

82

83

**Figure S4.** Soil carbon processes in the CrunchTope verification.

84

85

86

87

88

89

90

91

Detailed reaction network and reaction rate expressions of soil carbon processes are summarized in the following Table S3. For simplification, half-saturation constants  $K$  of different electron donors or electron acceptors are kept the same as  $1.5 \times 10^{-5}$  (mol/L). The inhibition constant of  $I_{O_2(aq)}$  and  $I_{NO_3^-}$  are set as  $1.5 \times 10^{-5}$  (mol/L) and  $1.5 \times 10^{-6}$  (mol/L), respectively. The chemical setup of the initial and injection conditions is listed in the following Table S4.

**Table S3.** Simulated soil carbon reactions in the verification case

| Reaction             | Equation                                                                    | Reaction rate expression                                                                                                                                                                                                       | Rate const<br>(log <sub>10</sub> ) |
|----------------------|-----------------------------------------------------------------------------|--------------------------------------------------------------------------------------------------------------------------------------------------------------------------------------------------------------------------------|------------------------------------|
| SOC<br>decomposition | $CH_2O(s) \rightarrow CH_2O(aq)$                                            | $k_{CH_2O(s)} A_{CH_2O(s)} X_{mio} \frac{C_{CH_2O(s)}}{C_{CH_2O(s)} + K_{CH_2O(s)}}$                                                                                                                                           | -11.0                              |
|                      | $CH_2O(aq) + O_2(aq) \rightarrow HCO_3^- + H^+$                             | $\kappa_{max,O_2(aq)} X_{mio} \frac{C_{CH_2O(aq)}}{C_{CH_2O(aq)} + K_{CH_2O(aq)}} \frac{C_{O_2(aq)}}{C_{O_2(aq)} + K_{O_2(aq)}}$                                                                                               | -10.0                              |
| Mineralization       | $CH_2O(aq) + 0.8NO_3^- \rightarrow HCO_3^- + 0.4N_2(aq) + 0.2H^+ + 0.4H_2O$ | $\kappa_{max,NO_3^-} X_{mio} \frac{C_{CH_2O(aq)}}{C_{CH_2O(aq)} + K_{CH_2O(aq)}} \frac{C_{NO_3^-}}{C_{NO_3^-} + K_{NO_3^-}} \frac{I_{O_2(aq)}}{I_{O_2(aq)} + C_{O_2(aq)}}$                                                     | -10.3                              |
|                      | $CH_2O(aq) + 0.5SO_4^{2-} \rightarrow HCO_3^- + 0.5H_2S(aq)$                | $\kappa_{max,SO_4^{2-}} X_{mio} \frac{C_{CH_2O(s)}}{C_{CH_2O(s)} + K_{CH_2O(s)}} \frac{C_{SO_4^{2-}}}{C_{SO_4^{2-}} + K_{SO_4^{2-}}} \frac{I_{O_2(aq)}}{I_{O_2(aq)} + C_{O_2(aq)}} \frac{I_{NO_3^-}}{I_{NO_3^-} + C_{NO_3^-}}$ | -11.0                              |

92

93

94

95

96

**Table S4.** Initial and injection conditions in the soil carbon verification case

| Species                      | Initial<br>(mol/L)     | Injection<br>(mol/L)   | Species<br>(continued)        | Initial<br>(mol/L)     | Injection<br>(mol/L)   |
|------------------------------|------------------------|------------------------|-------------------------------|------------------------|------------------------|
| pH                           | 6.0                    | 4.0                    | SO <sub>4</sub> <sup>2-</sup> | 3.0 × 10 <sup>-5</sup> | 3.0 × 10 <sup>-8</sup> |
| CH <sub>2</sub> O(aq)        | 1.0 × 10 <sup>-8</sup> | 1.0 × 10 <sup>-8</sup> | HCO <sub>3</sub> <sup>-</sup> | 1.0 × 10 <sup>-8</sup> | 1.0 × 10 <sup>-8</sup> |
| O <sub>2</sub> (aq)          | 3.0 × 10 <sup>-5</sup> | 3.0 × 10 <sup>-8</sup> | N <sub>2</sub> (aq)           | 1.0 × 10 <sup>-8</sup> | 1.0 × 10 <sup>-8</sup> |
| NO <sub>3</sub> <sup>-</sup> | 3.0 × 10 <sup>-5</sup> | 3.0 × 10 <sup>-8</sup> | H <sub>2</sub> S(aq)          | 1.0 × 10 <sup>-8</sup> | 1.0 × 10 <sup>-8</sup> |

97

98 Model results show that BioRT-Flux-PIHM closely matched CrunchTope results in  
99 both temporal evolution and spatial pattern of a variety of chemical species (Figure S5).  
100 The concentration profile of HCO<sub>3</sub><sup>-</sup> (yellow), which is the sum of three DOC mineralization  
101 reactions, demonstrates that BioRT-Flux-PIHM is capable of solving parallel microbially-  
102 mediated redox reactions. It is worth mentioning that O<sub>2</sub> (red) was consumed first and  
103 fast among all three electron acceptors (i.e., O<sub>2</sub>, NO<sub>3</sub><sup>-</sup>, SO<sub>4</sub><sup>2-</sup>). Following O<sub>2</sub> dynamic, the  
104 NO<sub>3</sub><sup>-</sup> (green) was consumed slowly at the beginning when O<sub>2</sub> was still present, but the  
105 NO<sub>3</sub><sup>-</sup> consumption became much faster once the O<sub>2</sub> was depleted and its inhibitory effect  
106 on NO<sub>3</sub><sup>-</sup> disappears. The same consumption pattern also applies for the SO<sub>4</sub><sup>2-</sup> (blue),  
107 which was consumed very slowly at the beginning when both O<sub>2</sub> and NO<sub>3</sub><sup>-</sup> inhibited the  
108 SO<sub>4</sub><sup>2-</sup> reaction. However, SO<sub>4</sub><sup>2-</sup> was consumed much faster when O<sub>2</sub> and NO<sub>3</sub><sup>-</sup>  
109 disappeared along with their inhibitory efforts. Such reaction sequence from model results  
110 essentially reproduced redox ladder biogeochemistry (inserted figure in Figure S6a),  
111 where top ladder reactions occur preferentially due to their higher redox potentials. In  
112 other words, soil microbes preferentially choose a redox reaction of DOC that most  
113 energy can be harvested. The spatial pattern of carbon solutes and other electron  
114 acceptors (Figure S5b) also show consistent results with CrunchTope. In short, both  
115 temporal and spatial patterns show consistent results with the benchmark CrunchTope  
116 regarding soil carbon decomposition and mineralization processes, suggesting the  
117 Monod rate law (e.g., substrate and inhibition terms) and environmental dependency  
118 (e.g., soil temperature) was correctly implemented.

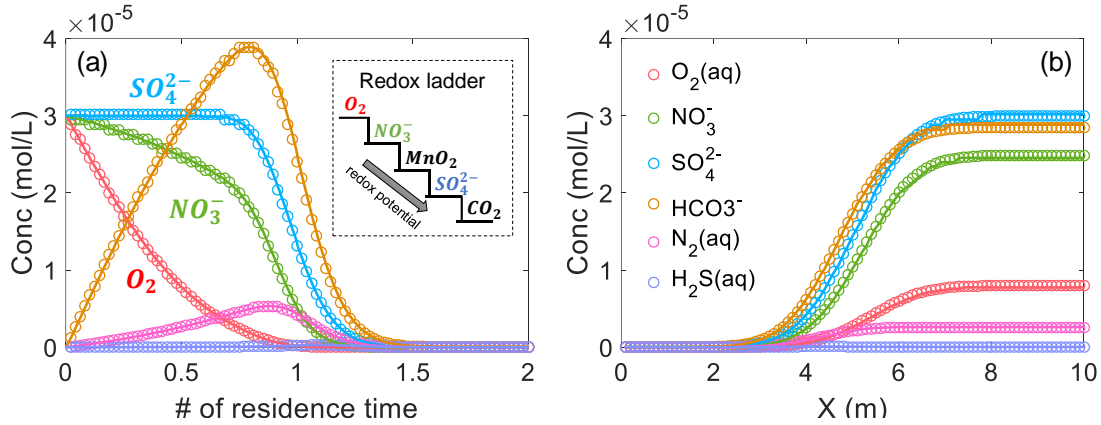

119  
 120 **Figure S5.** Soil carbon process verification at the column outlet (a) and at one residence time (b).  
 121 The embedded plot of the redox ladder is to demonstrate the code's ability to handle multiple  
 122 microbially-mediated reaction pathways under complex redox conditions. Circle markers are  
 123 BioRT-Flux-PIHM results while solid lines are CrunchTope results.

124

### 125 S1.3. Soil nitrogen processes

126 Simulated N processes include mineralization of dissolved organic nitrogen (DON)  
 127 to ammonium ( $\text{NH}_4^+$ ), subsequent nitrification converting  $\text{NH}_4^+$  to nitrate ( $\text{NO}_3^-$ ), and  
 128 followed by denitrification reducing  $\text{NO}_3^-$  to  $\text{N}_2$  (Figure S7). Similar to soil carbon, all these  
 129 sequential nitrogen transformations are microbial processes and follow the Monod rate  
 130 law (Eq. (15)). Soil temperature is set at 20 °C and soil nitrogen verification was performed  
 131 under the full transport condition of advection + diffusion + dispersion.

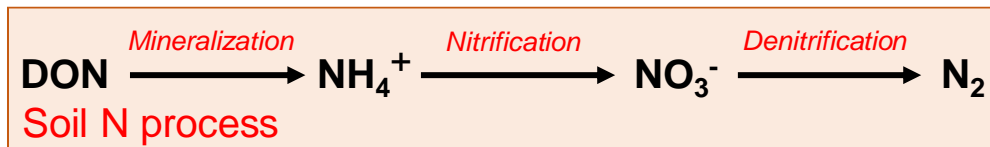

132

133 **Figure S6.** Soil nitrogen processes in the CrunchTope verification.

134

135 Detailed reaction network and reaction rate expressions of soil nitrogen processes  
 136 are summarized in Table S5. Half-saturation constants are as follows:  $K_{\text{RNH}_2} = 1.5 \times 10^{-5}$   
 137 (mol/L),  $K_{\text{O}_2(aq)} = 1.5 \times 10^{-5}$  (mol/L),  $K_{\text{NH}_4^+} = 3.0 \times 10^{-5}$  (mol/L),  $K_{\text{O}_2(aq)} = 4.5 \times 10^{-5}$  (mol/L).  
 138 The inhibition constant  $I_{\text{O}_2(aq)}$  is set as  $3.0 \times 10^{-5}$  (mol/L). The chemical setup of the initial  
 139 and injection condition is listed in Table S6.

140

**Table S5.** Simulated soil nitrogen reactions in the verification case

| Reaction        | Equation                                                                          | Reaction rate terms                                                                                                                                                 | Rate constant<br>(log <sub>10</sub> ) |
|-----------------|-----------------------------------------------------------------------------------|---------------------------------------------------------------------------------------------------------------------------------------------------------------------|---------------------------------------|
| Mineralization  | $RNH_2 + O_2(aq) + H_2O$<br>$\rightarrow NH_4^+ + ROH + OH^-$                     | $\kappa_{max,RNH_2} X_{mio} \frac{C_{RNH_2}}{C_{RNH_2} + K_{RNH_2}}$<br>$\frac{C_{O_2(aq)}}{C_{O_2(aq)} + K_{O_2(aq)}}$                                             | -10.0                                 |
| Nitrification   | $NH_4^+ + 2O_2(aq) \rightarrow$<br>$NO_3^- + 2H^+ + 2H_2O$                        | $\kappa_{max,NH_4^+} X_{mio} \frac{C_{NH_4^+}}{C_{NH_4^+} + K_{NH_4^+}}$<br>$\frac{C_{O_2(aq)}}{C_{O_2(aq)} + K_{O_2(aq)}}$                                         | -10.0                                 |
| Denitrification | $CH_2O + 0.8NO_3^- \rightarrow$<br>$HCO_3^- + 0.4N_2(aq)$<br>$+ 0.2H^+ + 0.4H_2O$ | $\kappa_{max,NO_3^-} X_{mio} \frac{C_{CH_2O}}{C_{CH_2O} + K_{CH_2O}}$<br>$\frac{C_{NO_3^-}}{C_{NO_3^-} + K_{NO_3^-}} \frac{I_{O_2(aq)}}{I_{O_2(aq)} + C_{O_2(aq)}}$ | -11.0                                 |

141

142

**Table S6.** Initial and injection conditions in the soil nitrogen verification case

| Species                      | Initial<br>(mol/L)     | Injection<br>(mol/L)   | Species<br>(continued)        | Initial<br>(mol/L)     | Injection<br>(mol/L)   |
|------------------------------|------------------------|------------------------|-------------------------------|------------------------|------------------------|
| pH                           | 6.0                    | 4.0                    | NO <sub>3</sub> <sup>-</sup>  | 3.0 × 10 <sup>-5</sup> | 3.0 × 10 <sup>-8</sup> |
| O <sub>2</sub> (aq)          | 3.0 × 10 <sup>-5</sup> | 3.0 × 10 <sup>-8</sup> | HCO <sub>3</sub> <sup>-</sup> | 1.0 × 10 <sup>-5</sup> | 1.0 × 10 <sup>-5</sup> |
| NH <sub>4</sub> <sup>+</sup> | 1.0 × 10 <sup>-8</sup> | 1.0 × 10 <sup>-8</sup> | N <sub>2</sub> (aq)           | 1.0 × 10 <sup>-8</sup> | 1.0 × 10 <sup>-8</sup> |

143

144

145

146

147

148

149

150

151

Model results show that BioRT-Flux-PIHM closely matched CrunchTope results in both temporal evolution and spatial pattern of a variety of nitrogen species (Figure S7). Products of NH<sub>4</sub><sup>+</sup>, NO<sub>3</sub><sup>-</sup>, and N<sub>2</sub>(aq), which mainly originates from soil organic nitrogen in a forest-type land (no fertilizer), are sensitive to redox conditions as nitrification is an aerobic process while denitrification occurs largely under anoxic conditions. The O<sub>2</sub>(aq) (red) was consumed (decreasing) both by the mineralization for production of NH<sub>4</sub><sup>+</sup> (green) and by the nitrification for production of NO<sub>3</sub><sup>-</sup> (blue). The depletion of O<sub>2</sub>(aq) decreased the production of NH<sub>4</sub><sup>+</sup> and NO<sub>3</sub><sup>-</sup>; however, it facilitated the generation of



152 N<sub>2</sub>(aq) (purple) via the denitrification process. The spatial patterns of nitrogen species  
 153 (Figure S7b) also show the same results as the CrunchTope. The nitrogen case  
 154 demonstrates the code capability to model sequential microbial processes under dynamic  
 155 redox conditions.

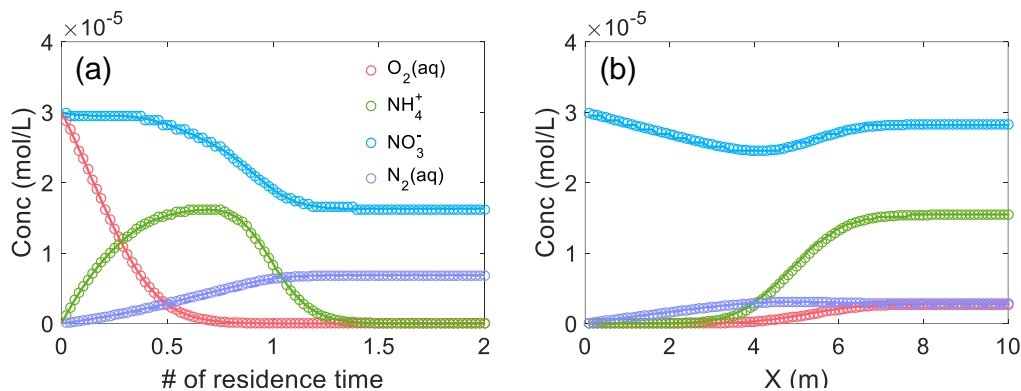

156  
 157 **Figure S7.** Soil nitrogen process verification at the column outlet (a) and at one residence time  
 158 (b). Circles are BioRT-Flux-PIHM results, while solid lines are CrunchTope results.

159

## 160 S2. Rooting density function

161 A rooting density function (Eq. (26)) was exponentially fitted based on field  
 162 measurement of root density distribution over depth at the Shale Hills watershed  
 163 (Hasenmueller et al., 2017).

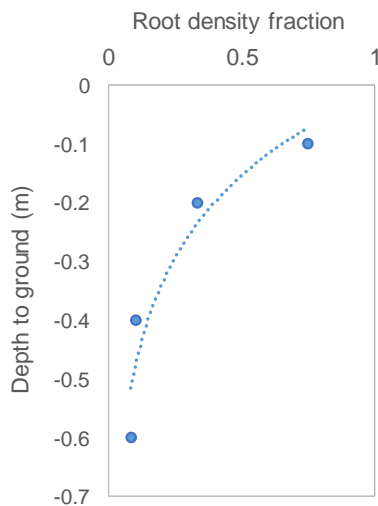

164

165 **Figure S8.** Rooting density fraction as a function of soil depth based on Shale Hills measurement  
 166 (Hasenmueller et al., 2017). Dots are normalized data of root intersection density (count/m<sup>2</sup>) while  
 167 the dashed line is the fitted function (Eq. (26), R<sup>2</sup> = 0.90).  
 168

### 169 **S3. Key parameters for hydrology and stream nitrate calibration at Shale Hills**

170 The model assumed a uniform soil type of the Weikert soil due to its dominance at  
 171 Shale Hills (Shi et al., 2013). For the deep zone, hydraulic properties were also assumed  
 172 to be uniform in the watershed. The deep zone porosity was set to 1/10 of the Weikert  
 173 soil porosity (Brantley et al., 2018; Kuntz et al., 2011). Hydrology was calibrated to  
 174 reproduce stream discharge and evapotranspiration (ET) (Figure S9). Deep groundwater  
 175 (Q<sub>G</sub>) from the deep zone was constrained by the previous work (Li et al., 2017) and the  
 176 concentration-discharge (C-Q) dynamics of nitrate in this work. Important land surface  
 177 and hydrological parameters of shallow and deep zones are summarized in the following  
 178 Table S7.

179 **Table S7.** Key parameters for hydrology calibration at Shale Hills

| Parameters              | Symbols              | Value | Note                                              |
|-------------------------|----------------------|-------|---------------------------------------------------|
| Land surface            | $C_{zil}$            | 0.19  | Zilitinkevich coefficient                         |
|                         | $HS$                 | 59    | Water vapor exchange coefficient                  |
|                         | $RS$                 | 177   | Minimum stomatal resistance (s/m)                 |
|                         | $WLTSMC$             | 0.062 | Wilting point                                     |
| Shallow zone properties | $K_{satH}^{shallow}$ | 6.86  | Horizontal saturated hydraulic conductivity (m/d) |
|                         | $K_{satV}^{shallow}$ | 1.21  | Vertical saturated hydraulic conductivity (m/d)   |
|                         | $K_{macH}^{shallow}$ | 4,805 | Macropore horizontal hydraulic conductivity (m/d) |
|                         | $K_{macV}^{shallow}$ | 149   | Macropore vertical hydraulic conductivity (m/d)   |
|                         | $D_{mac}$            | 1.6   | Macropore depth (m)                               |

|                      |                      |       |                                                                                              |
|----------------------|----------------------|-------|----------------------------------------------------------------------------------------------|
|                      | $\theta_s^{shallow}$ | 0.12  | Shallow zone porosity (m <sup>3</sup> /m <sup>3</sup> )                                      |
|                      | $\alpha$             | 8.45  | Shallow zone van Genuchten alpha, inversely proportional to pore diameter (m <sup>-1</sup> ) |
|                      | $n$                  | 1.19  | Shallow zone van Genuchten n, inversely proportional to water retention                      |
|                      | $D_{shallow}$        | 1.96  | Shallow zone thickness (m)                                                                   |
|                      | $K_{satH}^{deep}$    | 0.48  | Deep horizontal saturated hydraulic conductivity (m/d)                                       |
|                      | $K_{satV}^{deep}$    | 0.078 | Deep vertical saturated hydraulic conductivity (m/d)                                         |
| Deep zone properties | $\theta_s^{deep}$    | 0.012 | Deep zone porosity (m <sup>3</sup> /m <sup>3</sup> )                                         |
|                      | $\alpha$             | 1.22  | Deep zone van Genuchten n, inversely proportional to water retention (m <sup>-1</sup> )      |
|                      | $n$                  | 1.92  | Deep zone van Genuchten n, inversely proportional to water retention                         |
|                      | $D_{deep}$           | 10    | Deep zone thickness (m)                                                                      |

180

181 For microbial soil N leaching and denitrification, reaction rate constant  $k$  was  
182 specified (Regnier and Steefel, 1999) and the lumped surface area  $A$  (m<sup>2</sup>, = specific  
183 surface area m<sup>2</sup>/g × g of mass) was turned to reproduce stream nitrate dynamics and its  
184 C-Q pattern (Table S8). The calibrated effective specific surface area (SSA) were orders  
185 of magnitude lower than the lab measured SSA of natural materials (e.g., SOM, 0.6 ~ 2  
186 m<sup>2</sup>/g (Rutherford et al., 1992; Chiou et al., 1990)). Such discrepancies between calibrated  
187 effective reactive surface area (i.e., solid-water contact area) and lab measured absolute  
188 surface area is consistent with other observations (Li et al., 2014; Heidari et al., 2017).  
189 The nitrate uptake rate constant  $k_{uptake}$  was calibrated to constrain the partitioning of N  
190 transformation flux between denitrification and plant uptake by the ratio of 1:5, a value  
191 estimated from field measurements of gaseous N outputs (3.53 kg-N/ha/yr) and plant N  
192 uptake (18.3 kg-N/ha/yr) (Weitzman and Kaye, 2018). We assumed the nitrate uptake

193 rate  $k_{uptake}$  of the deep zone (> 2 m in depth) was 1/1000 of that in the shallow zone,  
 194 based on the observations that the rooting density exponentially decrease with depth  
 195 (Weitzman and Kaye, 2018; Hasenmueller et al., 2017). Groundwater nitrate was  
 196 initialized as 0.43 mg/L, the average of measured groundwater concentration during  
 197 2009-2010.

198 **Table S8.** Key parameters for nitrate calibration at Shale Hills watershed

| Reaction        | Log rate constant                          | Specific surface area (m <sup>2</sup> /g) |
|-----------------|--------------------------------------------|-------------------------------------------|
| Soil leaching   | -9.7 <sub>a</sub> (mol/m <sup>2</sup> /s)  | 1.6 × 10 <sup>-6</sup> <sub>b</sub>       |
| Denitrification | -10.0 <sub>a</sub> (mol/m <sup>2</sup> /s) | 7.5 × 10 <sup>-5</sup> <sub>b</sub>       |
| Plant uptake    | -8.0 <sub>b</sub> (L/s)                    |                                           |

199 Note: <sub>a</sub> Regnier and Steefel (1999); <sub>b</sub> calibrated values;

200

#### 201 **S4. Calibrated hydrology and water budget at Shale Hills**

202 The spatially implicit model well reproduced the seasonal dynamics of discharge  
 203 and ET (Figure S9), with daily Nash-Sutcliffe efficiency (NSE) of 0.56 and 0.66,  
 204 respectively. Precipitation occurs throughout the year while the discharge was responsive  
 205 to a few big storm events in the spring and fall. The ET peaked during the summer due  
 206 to higher solar radiation and higher temperatures while declined in the fall and winter. The  
 207 runoff ratio was 0.46, suggesting 46% of precipitation is discharged through the stream  
 208 while the remaining 54% contributed to ET. A breakdown analysis suggests at the annual  
 209 scale, the subsurface lateral flow ( $Q_L$ , 87% of  $Q$ ) dominated discharge, followed by the  
 210 deeper groundwater flow ( $Q_G$ , 9.3%) and the surface runoff ( $Q_S$ , 4.2%). Although  $Q_G$  was  
 211 not the largest component, it is essential in maintaining discharge during dry time,  
 212 especially in the summer.

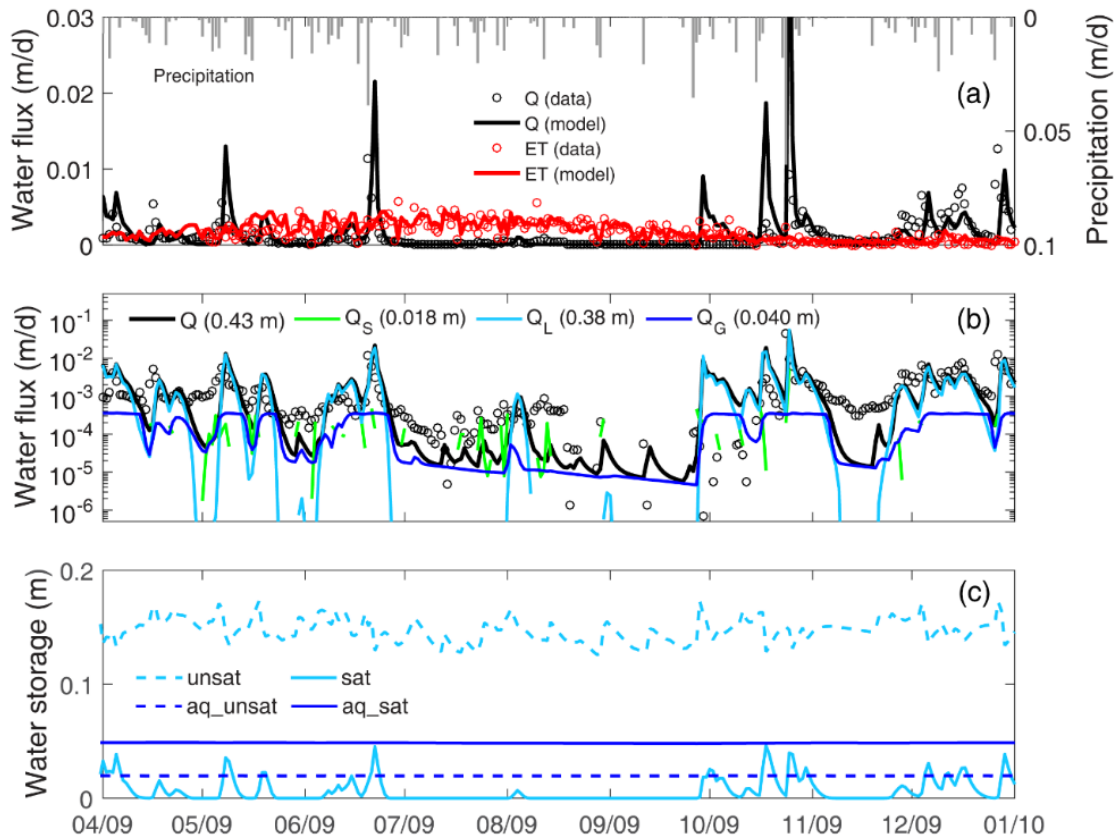

213  
 214 **Figure S9.** Hydrology and water flux at Shale Hills: (a) discharge and ET dynamics (data vs.  
 215 model); (b) discharge components of surface runoff ( $Q_s$ ), shallow lateral flow ( $Q_L$ ), and deep  
 216 groundwater ( $Q_G$ ); (c) water storage of unsaturated and saturated zone in the soil and aquifer  
 217 layer.

218  
 219  
 220  
 221  
 222  
 223  
 224  
 225  
 226  
 227

228 **Reference**

- 229 Brantley, S. L., White, T., West, N., Williams, J. Z., Forsythe, B., Shapich, D., Kaye, J., Lin, H.,  
230 Shi, Y. N., Kaye, M., Herndon, E., Davis, K. J., He, Y., Eissenstat, D., Weitzman, J.,  
231 DiBiase, R., Li, L., Reed, W., Brubaker, K., and Gu, X.: Susquehanna Shale Hills Critical  
232 Zone Observatory: Shale Hills in the Context of Shaver's Creek Watershed, *Vadose Zone*  
233 *Journal*, 17, 1-19, ARTN 180092, 10.2136/vzj2018.04.0092, 2018.
- 234 Chiou, C. T., Lee, J. F., and Boyd, S. A.: The surface area of soil organic matter, *Environmental*  
235 *Science & Technology*, 24, 1164-1166, 1990.
- 236 Hasenmueller, E. A., Gu, X., Weitzman, J. N., Adams, T. S., Stinchcomb, G. E., Eissenstat, D.  
237 M., Drohan, P. J., Brantley, S. L., and Kaye, J. P.: Weathering of rock to regolith: The  
238 activity of deep roots in bedrock fractures, *Geoderma*, 300, 11-31, 2017.
- 239 Heidari, P., Li, L., Jin, L., Williams, J. Z., and Brantley, S. L.: A reactive transport model for  
240 Marcellus shale weathering, *Geochimica et Cosmochimica Acta*, 217, 421-440, 2017.
- 241 Kuntz, B. W., Rubin, S., Berkowitz, B., and Singha, K.: Quantifying Solute Transport at the Shale  
242 Hills Critical Zone Observatory, *Vadose Zone Journal*, 10, 843-857, 10.2136/vzj2010.0130,  
243 2011.
- 244 Li, L., Salehikhoo, F., Brantley, S. L., and Heidari, P.: Spatial zonation limits magnesite dissolution  
245 in porous media, *Geochimica et Cosmochimica Acta*, 126, 555-573,  
246 10.1016/j.gca.2013.10.051, 2014.
- 247 Li, L., Bao, C., Sullivan, P. L., Brantley, S., Shi, Y., and Duffy, C.: Understanding watershed  
248 hydrogeochemistry: 2. Synchronized hydrological and geochemical processes drive  
249 stream chemostatic behavior, *Water Resources Research*, 53, 2346-2367, 2017.
- 250 Regnier, P., and Steefel, C. I.: A high resolution estimate of the inorganic nitrogen flux from the  
251 Scheldt estuary to the coastal North Sea during a nitrogen-limited algal bloom, spring 1995,  
252 *Geochimica et Cosmochimica Acta*, 63, 1359-1374, 10.1016/s0016-7037(99)00034-4,  
253 1999.
- 254 Rutherford, D. W., Chiou, C. T., and Kile, D. E.: Influence of soil organic matter composition on  
255 the partition of organic compounds, *Environmental science & technology*, 26, 336-340,  
256 1992.
- 257 Shi, Y., Davis, K. J., Duffy, C. J., and Yu, X.: Development of a coupled land surface hydrologic  
258 model and evaluation at a critical zone observatory, *Journal of Hydrometeorology*, 14,  
259 1401-1420, 2013.
- 260 Steefel, C., Appelo, C., Arora, B., Jacques, D., Kalbacher, T., Kolditz, O., Lagneau, V., Lichtner,  
261 P., Mayer, K. U., and Meeussen, J.: Reactive transport codes for subsurface  
262 environmental simulation, *Computational Geosciences*, 19, 445-478, 2015.
- 263 Steefel, C. I., and Lasaga, A. C.: A coupled model for transport of multiple chemical species and  
264 kinetic precipitation/dissolution reactions with application to reactive flow in single phase  
265 hydrothermal systems, *American Journal of science*, 294, 529-592, 1994.
- 266 Weitzman, J. N., and Kaye, J. P.: Nitrogen Budget and Topographic Controls on Nitrous Oxide in  
267 a Shale-Based Watershed, *Journal of Geophysical Research: Biogeosciences*, 123, 1888-  
268 1908, 2018.
- 269
- 270
